# Supplementary material
Source: PubMed Central journal article supplement (PMC3605953)
Supplement: supp_mct018_mct018supp.pdf [file supp_mct018_mct018supp.pdf]

## SUPPLEMENTARY DATA

TABLE S1. Segregating populations of *Alopecurus myosuroides* analysed and number of seeds analysed

| Segregating population | Experiment       | no. seeds used | No. seeds recovered after burial (% # seeds used) | No. seeds genotyped (% # seeds used) | Genotype at <i>ACC</i> ase (no. plants)* |               |               |
|------------------------|------------------|----------------|---------------------------------------------------|--------------------------------------|------------------------------------------|---------------|---------------|
|                        |                  |                |                                                   |                                      | M/M                                      | M/W           | W/W           |
| Leu-1781-D24-04        | Fresh seed 2004  | 200            | -                                                 | 175 (87.5)                           | 43                                       | 88            | 44            |
|                        | Buried seed 2004 | 400            | 326 (81.5)                                        | 90 (22.5)                            | 27                                       | 44            | 19            |
| Leu-1781-D57-04        | Fresh seed 2004  | 200            | -                                                 | 179 (89.5)                           | 46                                       | 82            | 51            |
|                        | Buried seed 2004 | 400            | 315 (78.8)                                        | 246 (61.5)                           | 63                                       | 125           | 58            |
| Leu-1781-D98-04        | Fresh seed 2004  | 200            | -                                                 | 190 (95.0)                           | 57                                       | 82            | 51            |
|                        | Buried seed 2004 | 400            | 325 (81.3)                                        | 131 (32.8)                           | 46                                       | 64            | 21            |
| Leu-1781-D121-04       | Fresh seed 2004  | 200            | -                                                 | 112 (56.0)                           | 32                                       | 49            | 31            |
|                        | Buried seed 2004 | 400            | 321 (80.3)                                        | 131 (32.8)                           | <b>41**</b>                              | <b>40**</b>   | <b>50**</b>   |
| Leu-1781-D143-04       | Fresh seed 2004  | 200            | -                                                 | 189 (94.5)                           | 49                                       | 92            | 48            |
|                        | Buried seed 2004 | 400            | 330 (82.5)                                        | 114 (28.5)                           | 26                                       | 59            | 29            |
| Asn-2041-D60-04        | Fresh seed 2004  | 333            | -                                                 | 284 (85.3)                           | 77                                       | 143           | 64            |
|                        | Buried seed 2004 | 666            | 465 (69.8)                                        | 121 (18.2)                           | 27                                       | 64            | 30            |
| Asn-2041-D83-04        | Fresh seed 2004  | 333            | -                                                 | 295 (88.6)                           | 73                                       | 155           | 67            |
|                        | Buried seed 2004 | 666            | 562 (84.4)                                        | 378 (56.8)                           | 81                                       | 197           | 100           |
| Asn-2041-D121-04       | Fresh seed 2004  | 333            | -                                                 | 136 (40.8)                           | 24                                       | 64            | 48            |
|                        | Buried seed 2004 | 666            | 501 (75.2)                                        | 401 (60.2)                           | 88                                       | 206           | 107           |
| Gly-2078-D41-04        | Fresh seed 2004  | 500            | -                                                 | 449 (89.8)                           | <b>59***</b>                             | <b>198***</b> | <b>192***</b> |
|                        | Buried seed 2004 | 1000           | 792 (79.2)                                        | 429 (42.9)                           | 92                                       | 207           | 130           |
| Gly-2078-D83-04        | Fresh seed 2004  | 500            | -                                                 | 443 (88.6)                           | <b>82***</b>                             | <b>198***</b> | <b>163***</b> |

|                  |                  |      |            |            |            |            |            |
|------------------|------------------|------|------------|------------|------------|------------|------------|
|                  | Buried seed 2004 | 1000 | 692 (69.2) | 94 (9.4)   | <b>16*</b> | <b>39*</b> | <b>39*</b> |
| Leu-1781-D24-05  | Fresh seed 2005  | 200  | -          | 177 (88.5) | 38         | 97         | 42         |
|                  | Buried seed 2005 | 400  | 272 (68.0) | 243 (60.8) | 68         | 116        | 59         |
| Leu-1781-D57-05  | Fresh seed 2005  | 200  | -          | 181 (90.5) | 36         | 100        | 45         |
|                  | Buried seed 2005 | 400  | 200 (50.0) | 100 (25.0) | 24         | 48         | 28         |
| Leu-1781-D98-05  | Fresh seed 2005  | 200  | -          | 183 (91.5) | 43         | 84         | 56         |
|                  | Buried seed 2005 | 400  | 255 (63.8) | 102 (25.5) | 27         | 47         | 28         |
| Leu-1781-D121-05 | Fresh seed 2005  | 200  | -          | 191 (95.5) | 44         | 90         | 57         |
|                  | Buried seed 2005 | 400  | 228 (57.0) | 118 (29.5) | 23         | 61         | 34         |
| Leu-1781-D143-05 | Fresh seed 2005  | 200  | -          | 191 (95.5) | 41         | 101        | 49         |
|                  | Buried seed 2005 | 400  | 223 (55.8) | 191 (47.8) | <b>35*</b> | <b>87*</b> | <b>69*</b> |
| Asn-2041-D60-05  | Fresh seed 2005  | 333  | -          | 280 (84.1) | 69         | 136        | 75         |
|                  | Buried seed 2005 | 666  | 310 (46.5) | 137 (20.6) | 37         | 61         | 39         |
| Asn-2041-D83-05  | Fresh seed 2005  | 333  | -          | 299 (89.8) | 71         | 150        | 78         |
|                  | Buried seed 2005 | 666  | 424 (63.7) | 292 (43.8) | 77         | 138        | 77         |
| Asn-2041-D121-05 | Fresh seed 2005  | 333  | -          | 294 (88.3) | 88         | 141        | 65         |
|                  | Buried seed 2005 | 666  | 361 (54.2) | 282 (42.3) | 73         | 125        | 84         |
| Gly-2078-D41-05  | Fresh seed 2005  | 500  | -          | 405 (81.0) | 92         | 199        | 114        |
|                  | Buried seed 2005 | 1000 | 480 (48.0) | 174 (17.4) | 46         | 81         | 47         |
| Gly-2078-D83-05  | Fresh seed 2005  | 500  | -          | 409 (81.8) | 95         | 192        | 122        |
|                  | Buried seed 2005 | 1000 | 723 (72.3) | 492 (49.2) | 119        | 245        | 128        |

\*  $P$ -value  $< 0.01$  (\*\*) or  $< 0.001$  (\*\*\*) for the observed numbers of W/W, M/W and M/M plants to significantly differ from the expected numbers of such plants if the proportions of these genotypes were 25%, 50% and 25%, respectively.

TABLE S2. Test statistics for an effect of the explanatory variables used in the accelerated failure time (AFT) models describing seed germination (fresh seed experiments)

| Variable                                   | d.f. | $\chi^2$ | $P > \chi^2$ |
|--------------------------------------------|------|----------|--------------|
| <i>Leu-1781 ACCase</i>                     |      |          |              |
| Year                                       | 1    | 0.995    | 0.318        |
| Population                                 | 4    | 96.55    | < 0.0001     |
| Genotype                                   | 2    | 19.55    | < 0.0001     |
| Year $\times$ Population                   | 4    | 37.24    | < 0.0001     |
| Year $\times$ Genotype                     | 2    | 1.852    | 0.396        |
| Population $\times$ Genotype               | 8    | 8.900    | 0.351        |
| Year $\times$ Population $\times$ Genotype | 8    | 3.865    | 0.869        |
| <i>Asn-2041 ACCase</i>                     |      |          |              |
| Year                                       | 1    | 9.322    | 0.0023       |
| Population                                 | 2    | 11.367   | 0.0034       |
| Genotype                                   | 2    | 0.939    | 0.625        |
| Year $\times$ Population                   | 2    | 2.777    | 0.249        |
| Year $\times$ Genotype                     | 2    | 4.093    | 0.129        |
| Population $\times$ Genotype               | 4    | 0.896    | 0.925        |
| Year $\times$ Population $\times$ Genotype | 4    | 3.736    | 0.442        |
| <i>Gly-2078 ACCase</i>                     |      |          |              |
| Year                                       | 1    | 41.004   | < 0.0001     |
| Population                                 | 1    | 0.015    | 0.901        |
| Genotype                                   | 2    | 10.542   | 0.0051       |
| Year $\times$ Population                   | 1    | 7.454    | 0.0063       |
| Year $\times$ Genotype                     | 2    | 5.410    | 0.0669       |
| Population $\times$ Genotype               | 2    | 0.236    | 0.888        |
| Year $\times$ Population $\times$ Genotype | 2    | 2.428    | 0.297        |

TABLE S3. Test statistics for an effect of the explanatory variables used in the accelerated failure time (AFT) models describing seed germination (buried seed experiments)

| Variable                                   | d.f. | $\chi^2$ | $P > \chi^2$ |
|--------------------------------------------|------|----------|--------------|
| <i>Leu-1781 ACCase</i>                     |      |          |              |
| Year                                       | 1    | 8.414    | 0.0037       |
| Population                                 | 4    | 15.708   | 0.0034       |
| Genotype                                   | 2    | 1.753    | 0.413        |
| Year $\times$ Population                   | 4    | 37.368   | < 0.0001     |
| Year $\times$ Genotype                     | 2    | 1.277    | 0.528        |
| Population $\times$ Genotype               | 8    | 9.378    | 0.311        |
| Year $\times$ Population $\times$ Genotype | 8    | 8.930    | 0.348        |
| <i>Asn-2041 ACCase</i>                     |      |          |              |
| Year                                       | 1    | 45.000   | < 0.0001     |
| Population                                 | 2    | 0.539    | 0.764        |
| Genotype                                   | 2    | 15.481   | 0.0004       |
| Year $\times$ Population                   | 2    | 3.785    | 0.151        |
| Year $\times$ Genotype                     | 2    | 0.313    | 0.855        |
| Population $\times$ Genotype               | 4    | 1.877    | 0.758        |
| Year $\times$ Population $\times$ Genotype | 4    | 3.710    | 0.447        |
| <i>Gly-2078 ACCase</i>                     |      |          |              |
| Year                                       | 1    | 62.822   | < 0.0001     |
| Population                                 | 1    | 15.553   | < 0.0001     |
| Genotype                                   | 2    | 4.396    | 0.111        |
| Year $\times$ Population                   | 1    | 128.240  | < 0.0001     |
| Year $\times$ Genotype                     | 2    | 1.477    | 0.478        |
| Population $\times$ Genotype               | 2    | 1.279    | 0.528        |
| Year $\times$ Population $\times$ Genotype | 2    | 3.701    | 0.157        |

TABLE S4. Tests statistics for an effect of the explanatory variables used in the generalised linear models describing germination success (fresh seed experiments)

| Variable                     | d.f. | Deviance | $P > \chi^2$ |
|------------------------------|------|----------|--------------|
| <i>Leu-1781 ACCase</i>       |      |          |              |
| Year                         | 1    | 33.179   | < 0.0001     |
| Population                   | 4    | 24.276   | < 0.0001     |
| Genotype                     | 2    | 29.409   | < 0.0001     |
| Year × Population            | 4    | 7.620    | 0.106        |
| Year × Genotype              | 2    | 5.026    | 0.081        |
| Population × Genotype        | 8    | 10.326   | 0.243        |
| Year × Population × Genotype | 8    | 7.941    | 0.439        |
| <i>Asn-2041 ACCase</i>       |      |          |              |
| Year                         | 1    | 19.796   | < 0.0001     |
| Population                   | 2    | 0.585    | 0.746        |
| Genotype                     | 2    | 3.879    | 0.144        |
| Year × Population            | 2    | 2.109    | 0.348        |
| Year × Genotype              | 2    | 3.580    | 0.167        |
| Population × Genotype        | 4    | 1.992    | 0.737        |
| Year × Population × Genotype | 4    | 3.466    | 0.483        |
| <i>Gly-2078 ACCase</i>       |      |          |              |
| Year                         | 1    | 0.269    | 0.604        |
| Population                   | 1    | 2.756    | 0.097        |
| Genotype                     | 2    | 4.947    | 0.084        |
| Year × Population            | 1    | 2.230    | 0.135        |
| Year × Genotype              | 2    | 27.693   | < 0.0001     |
| Population × Genotype        | 2    | 6.834    | 0.0328       |
| Year × Population × Genotype | 2    | 2.200    | 0.333        |

TABLE S5. Tests statistics for an effect of the explanatory variables used in the generalised linear models describing germination success (buried seed experiments)

| Variable                     | d.f. | Deviance | $P > \chi^2$ |
|------------------------------|------|----------|--------------|
| <i>Leu-1781 ACCase</i>       |      |          |              |
| Year                         | 1    | 38.600   | < 0.0001     |
| Population                   | 4    | 10.123   | 0.0384       |
| Genotype                     | 2    | 5.774    | 0.056        |
| Year × Population            | 4    | 8.360    | 0.079        |
| Year × Genotype              | 2    | 1.984    | 0.371        |
| Population × Genotype        | 8    | 4.818    | 0.777        |
| Year × Population × Genotype | 8    | 4.342    | 0.825        |
| <i>Asn-2041 ACCase</i>       |      |          |              |
| Year                         | 1    | 19.132   | < 0.0001     |
| Population                   | 2    | 14.348   | 0.0008       |
| Genotype                     | 2    | 16.198   | 0.0003       |
| Year × Population            | 2    | 7.861    | 0.0196       |
| Year × Genotype              | 2    | 0.457    | 0.796        |
| Population × Genotype        | 4    | 2.930    | 0.569        |
| Year × Population × Genotype | 4    | 0.247    | 0.993        |
| <i>Gly-2078 ACCase</i>       |      |          |              |
| Year                         | 1    | 18.304   | < 0.0001     |
| Population                   | 1    | 7.333    | 0.0068       |
| Genotype                     | 2    | 1.354    | 0.508        |
| Year × Population            | 1    | 0.185    | 0.667        |
| Year × Genotype              | 2    | 0.066    | 0.967        |
| Population × Genotype        | 2    | 2.718    | 0.257        |
| Year × Population × Genotype | 2    | 2.948    | 0.229        |

TABLE S6. Tests statistics for an effect of the explanatory variables used in linear models describing leaf length (fresh seed experiments)

| Variable                     | d.f. | <i>F</i> | <i>P</i> > <i>F</i> |
|------------------------------|------|----------|---------------------|
| <i>Leu-1781 ACCase</i>       |      |          |                     |
| Year                         | 1    | 85.8108  | < 0.0001            |
| Population                   | 4    | 5.6807   | 0.0002              |
| Genotype                     | 2    | 0.7128   | 0.491               |
| Year × Population            | 4    | 3.3785   | 0.0091              |
| Year × Genotype              | 2    | 2.1096   | 0.1221              |
| Population × Genotype        | 8    | 0.6002   | 0.7781              |
| Year × Population × Genotype | 8    | 0.5616   | 0.810               |
| <i>Asn-2041 ACCase</i>       |      |          |                     |
| Year                         | 1    | 2.763    | 0.097               |
| Population                   | 2    | 0.788    | 0.455               |
| Genotype                     | 2    | 1.314    | 0.267               |
| Year × Population            | 2    | 1.053    | 0.350               |
| Year × Genotype              | 2    | 0.338    | 0.713               |
| Population × Genotype        | 4    | 0.817    | 0.514               |
| Year × Population × Genotype | 4    | 1.171    | 0.323               |
| <i>Gly-2078 ACCase</i>       |      |          |                     |
| Year                         | 1    | 0.531    | 0.466               |
| Population                   | 1    | 1.340    | 0.248               |
| Genotype                     | 2    | 0.973    | 0.379               |
| Year × Population            | 1    | 0.088    | 0.766               |
| Year × Genotype              | 2    | 5.790    | 0.0033              |
| Population × Genotype        | 2    | 4.115    | 0.0170              |
| Year × Population × Genotype | 2    | 1.414    | 0.244               |

TABLE S7. Tests statistics for an effect of the explanatory variables used in linear models describing leaf length (buried seed experiments)

| Variable                     | d.f. | <i>F</i> | <i>P</i> > <i>F</i> |
|------------------------------|------|----------|---------------------|
| <i>Leu-1781 ACCase</i>       |      |          |                     |
| Year                         | 1    | 53.505   | < 0.0001            |
| Population                   | 4    | 7.481    | < 0.0001            |
| Genotype                     | 2    | 0.041    | 0.960               |
| Year × Population            | 4    | 2.286    | 0.059               |
| Year × Genotype              | 2    | 1.223    | 0.295               |
| Population × Genotype        | 8    | 1.438    | 0.178               |
| Year × Population × Genotype | 8    | 2.042    | 0.0398              |
| <i>Asn-2041 ACCase</i>       |      |          |                     |
| Year                         | 1    | 74.184   | < 0.0001            |
| Population                   | 2    | 10.306   | < 0.0001            |
| Genotype                     | 2    | 4.344    | 0.0134              |
| Year × Population            | 2    | 5.261    | 0.0054              |
| Year × Genotype              | 2    | 0.859    | 0.424               |
| Population × Genotype        | 4    | 0.407    | 0.804               |
| Year × Population × Genotype | 4    | 0.799    | 0.526               |
| <i>Gly-2078 ACCase</i>       |      |          |                     |
| Year                         | 1    | 29.136   | < 0.0001            |
| Population                   | 1    | 12.749   | 0.0004              |
| Genotype                     | 2    | 6.244    | 0.0021              |
| Year × Population            | 1    | 0.009    | 0.923               |
| Year × Genotype              | 2    | 0.127    | 0.881               |
| Population × Genotype        | 2    | 0.128    | 0.880               |
| Year × Population × Genotype | 2    | 1.558    | 0.212               |



TABLE S8. Tests statistics for an effect of the explanatory variables used in linear models describing root length (fresh seed experiments)

| Variable                     | d.f. | <i>F</i> | <i>P</i> > <i>F</i> |
|------------------------------|------|----------|---------------------|
| <i>Leu-1781 ACCase</i>       |      |          |                     |
| Year                         | 1    | 9.712    | 0.0019              |
| Population                   | 4    | 3.608    | 0.0064              |
| Genotype                     | 2    | 3.923    | 0.0202              |
| Year × Population            | 4    | 2.732    | 0.0282              |
| Year × Genotype              | 2    | 0.700    | 0.497               |
| Population × Genotype        | 8    | 0.712    | 0.681               |
| Year × Population × Genotype | 8    | 1.098    | 0.362               |
| <i>Asn-2041 ACCase</i>       |      |          |                     |
| Year                         | 1    | 2.076    | 0.150               |
| Population                   | 2    | 7.241    | 0.0008              |
| Genotype                     | 2    | 3.106    | 0.0456              |
| Year × Population            | 2    | 2.563    | 0.078               |
| Year × Genotype              | 2    | 2.196    | 0.112               |
| Population × Genotype        | 4    | 2.003    | 0.093               |
| Year × Population × Genotype | 4    | 0.242    | 0.914               |
| <i>Gly-2078 ACCase</i>       |      |          |                     |
| Year                         | 1    | 5.663    | 0.0178              |
| Population                   | 1    | 1.402    | 0.237               |
| Genotype                     | 2    | 0.547    | 0.579               |
| Year × Population            | 1    | 2.934    | 0.087               |
| Year × Genotype              | 2    | 1.119    | 0.328               |
| Population × Genotype        | 2    | 0.111    | 0.895               |
| Year × Population × Genotype | 2    | 1.336    | 0.264               |

TABLE S9. Tests statistics for an effect of the explanatory variables used in linear models describing root length (buried seed experiments).

| Variable                     | d.f. | <i>F</i> | <i>P</i> > <i>F</i> |
|------------------------------|------|----------|---------------------|
| <i>Leu-1781 ACCase</i>       |      |          |                     |
| Year                         | 1    | 776.209  | < 0.0001            |
| Population                   | 4    | 8.778    | < 0.0001            |
| Genotype                     | 2    | 0.664    | 0.515               |
| Year × Population            | 4    | 1.701    | 0.148               |
| Year × Genotype              | 2    | 1.816    | 0.164               |
| Population × Genotype        | 8    | 0.970    | 0.458               |
| Year × Population × Genotype | 8    | 0.670    | 0.718               |
| <i>Asn-2041 ACCase</i>       |      |          |                     |
| Year                         | 1    | 478.650  | < 0.0001            |
| Population                   | 2    | 70.869   | < 0.0001            |
| Genotype                     | 2    | 0.761    | 0.467               |
| Year × Population            | 2    | 56.568   | < 0.0001            |
| Year × Genotype              | 2    | 1.400    | 0.247               |
| Population × Genotype        | 4    | 1.338    | 0.254               |
| Year × Population × Genotype | 4    | 0.530    | 0.714               |
| <i>Gly-2078 ACCase</i>       |      |          |                     |
| Year                         | 1    | 259.531  | < 0.0001            |
| Population                   | 1    | 3.849    | 0.0505              |
| Genotype                     | 2    | 0.393    | 0.676               |
| Year × Population            | 1    | 20.028   | < 0.0001            |
| Year × Genotype              | 2    | 0.618    | 0.539               |
| Population × Genotype        | 2    | 0.624    | 0.536               |
| Year × Population × Genotype | 2    | 0.319    | 0.727               |
